# Supplementary material for: Systematic control of α-Fe2O3 crystal growth direction for improved electrochemical performance of lithium-ion battery anodes
Source: publisher site journal article supplement (doi:10.3762/bjnano.8.204), 2017-09-28
Supplement: Additional file 1 [file 2190-4286-8-204-S1.pdf]

## Supporting Information

for

# **Systematic control of $\alpha$ -Fe<sub>2</sub>O<sub>3</sub> crystal growth direction for improved electrochemical performance of lithium-ion battery anodes**

Nan Shen<sup>1</sup>, Miriam Keppeler<sup>1</sup>, Barbara Stiaszny<sup>2</sup>, Holger Hain<sup>2</sup>, Filippo Maglia<sup>2</sup>, and Madhavi Srinivasan<sup>1,\*</sup>

Address: <sup>1</sup>BMW-NTU Future Mobility Research Lab, Nanyang Technological University, School of Materials Science and Engineering, and Energy Research Institute at Nanyang (ERI@N), Research Techno Plaza, X-Frontier Blk, 50 Nanyang Drive, Singapore 637553, Singapore, and <sup>2</sup>BMW Group, Petuelring 130, 80788 Munich, Germany

\* Corresponding author

Email: Madhavi Srinivasan - [Madhavi@ntu.edu.sg](mailto:Madhavi@ntu.edu.sg)

## **Additional experimental results**

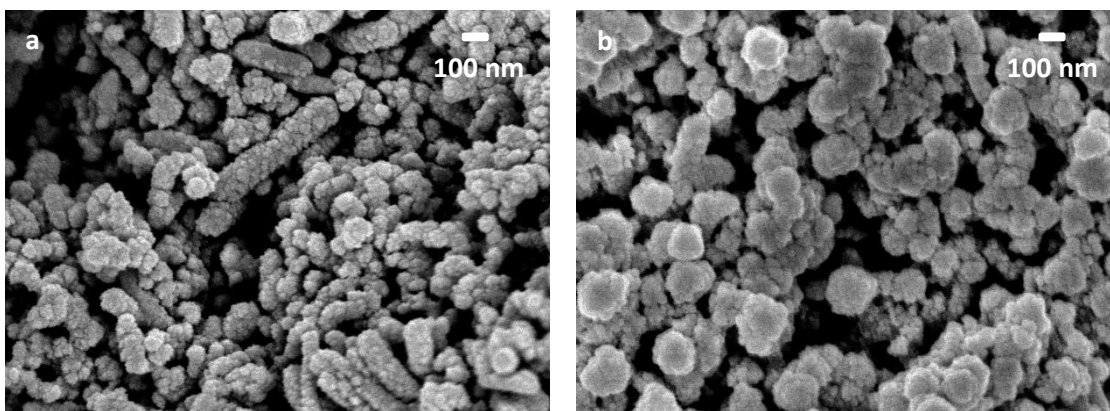

**Figure S1:** After-cycling FESEM images for a) intermediated sized nanorods ( $\alpha\text{-Fe}_2\text{O}_3\text{-E1.5}$ ) and b) elongated nanorods ( $\alpha\text{-Fe}_2\text{O}_3\text{-D1.5}$ ).

Coin cells ( $\alpha\text{-Fe}_2\text{O}_3\text{-E1.5}$ , rod length  $\sim 280$  nm and  $\alpha\text{-Fe}_2\text{O}_3\text{-D1.5}$ , rod length  $\sim 390$  nm) were opened after 50 cycles at 0.1 C. The electrodes were collected, and after-cycling morphology was examined by FESEM (Fig. S1). The rodlike morphology is not preserved during lithium intake and release for elongated nanorods ( $\sim 390$  nm), while intermediate sized nanorods ( $\sim 280$  nm) show a higher ability to preserve their longish shape, although the surface morphology is distorted. This observation further confirms the proposed assumption that intermediate sized  $\alpha\text{-Fe}_2\text{O}_3$  nanorods exhibit higher resistance to volumetric expansion during galvanostatic cycling.

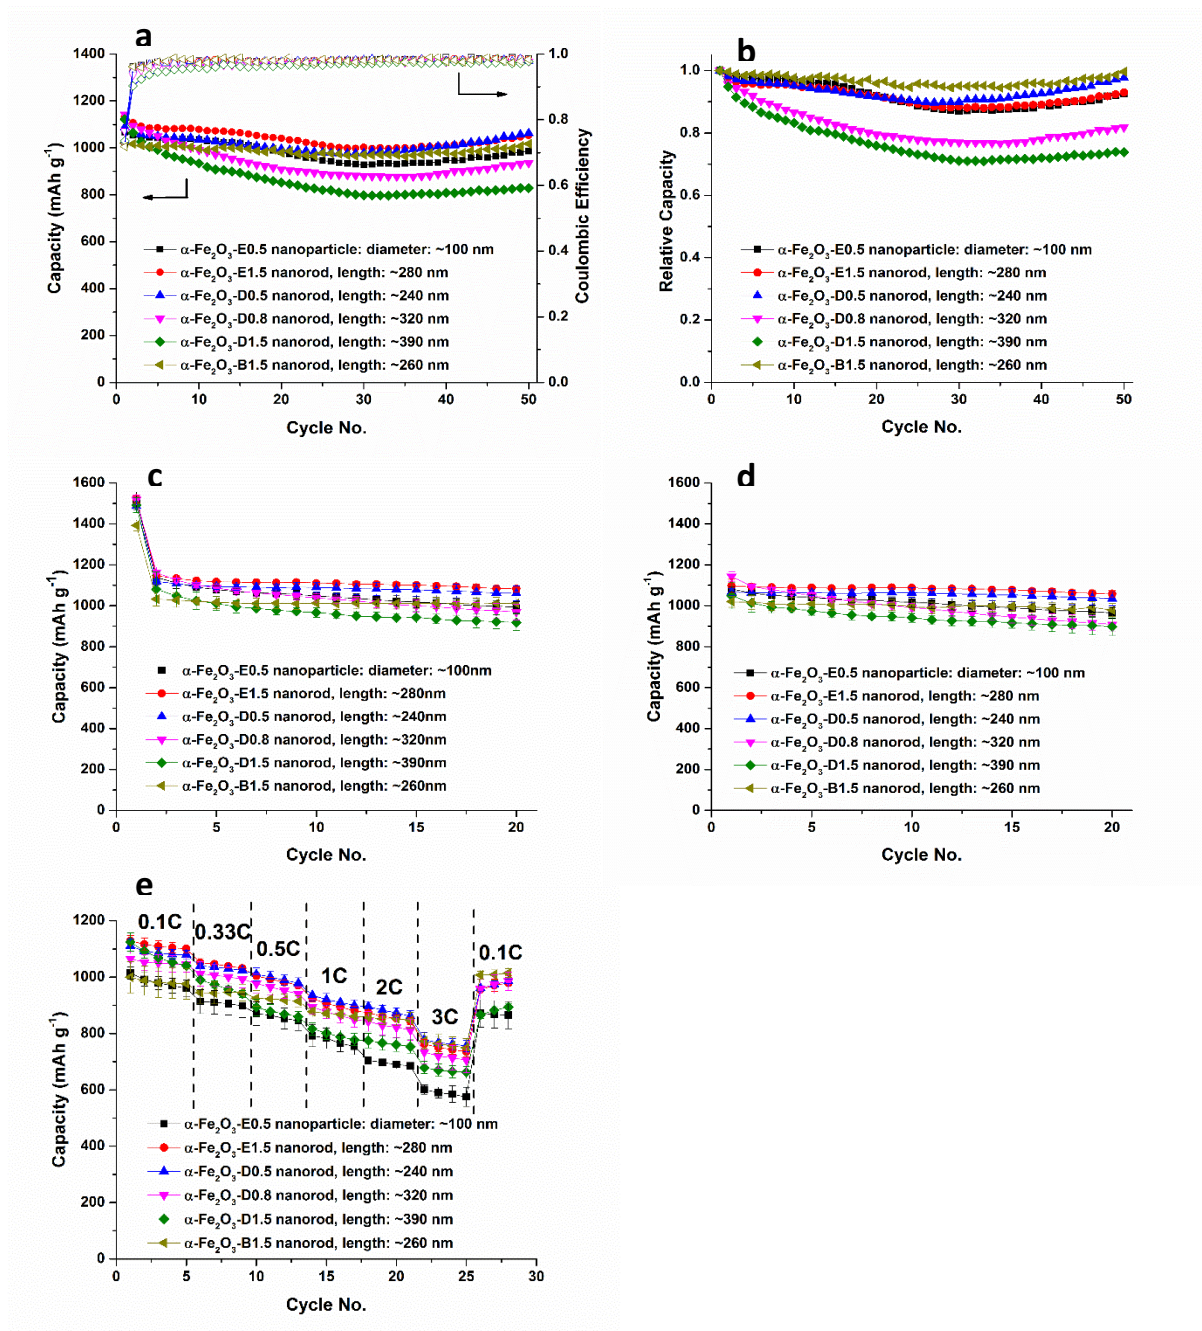

**Figure S2:** a) Delithiation capacity, b) relative delithiation capacity, c) error bars of lithiation capacity, d) error bars of delithiation capacity, and e) error bars of delithiation capacity for rate testing of  $\alpha$ -Fe<sub>2</sub>O<sub>3</sub>-E0.5,  $\alpha$ -Fe<sub>2</sub>O<sub>3</sub>-E1.5,  $\alpha$ -Fe<sub>2</sub>O<sub>3</sub>-D0.5,  $\alpha$ -Fe<sub>2</sub>O<sub>3</sub>-D0.8,  $\alpha$ -Fe<sub>2</sub>O<sub>3</sub>-D1.5 and  $\alpha$ -Fe<sub>2</sub>O<sub>3</sub>-B1.5.

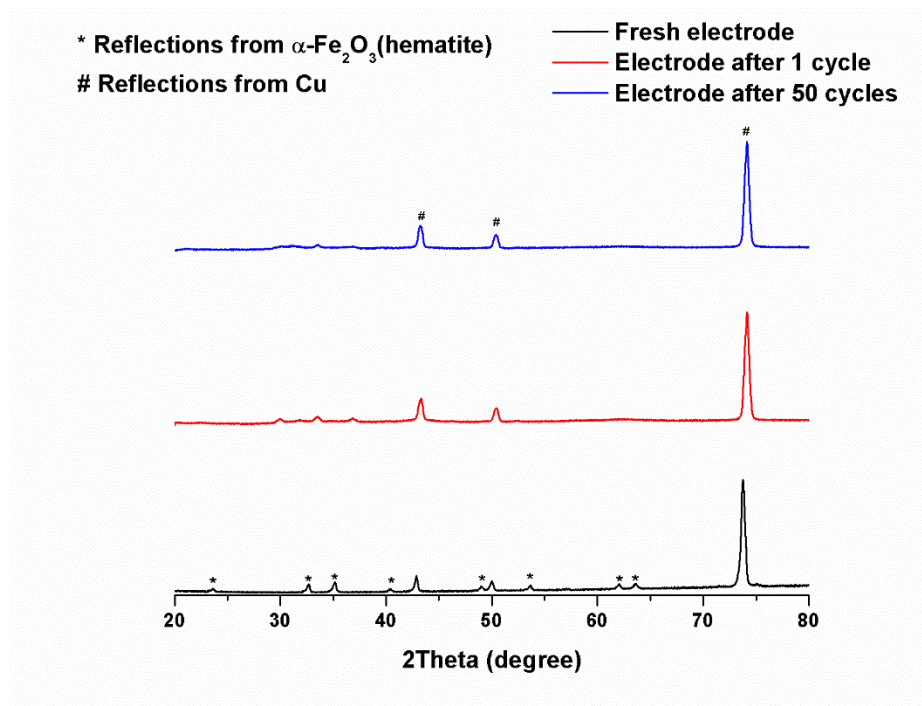

**Figure S3:** Ex-situ XRD reflections for  $\alpha\text{-Fe}_2\text{O}_3\text{-E1.5}$  before and after cycling.

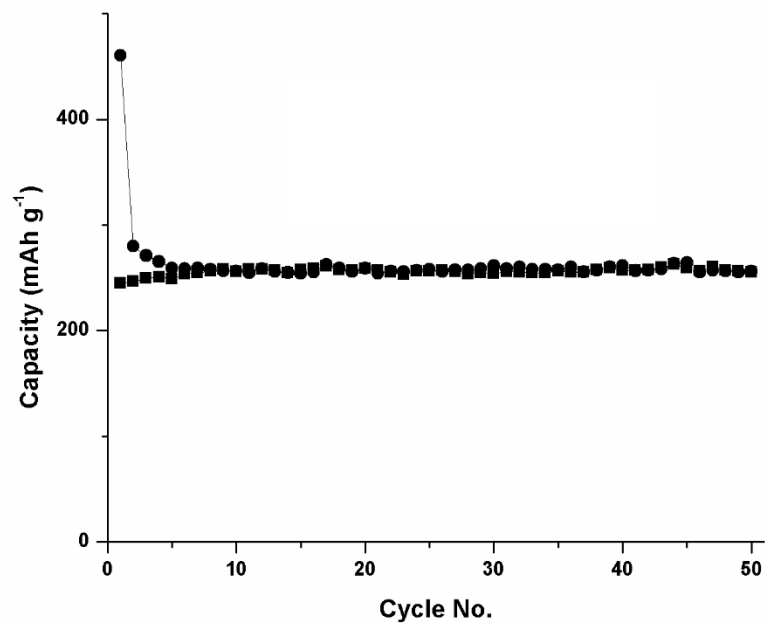

**Figure S4:** Half-cell composed of pure carbon black and pvdf (80% carbon black), cycled at 0.1 C.
